# Supplementary material for: Video analysis of Achilles tendon rupture in male professional football (soccer) players: injury mechanisms, patterns and biomechanics
Source: PubMed Central journal article supplement — BMJ Open Sport Exerc Med. 2022 Sep 22;8(3):e001419. doi: 10.1136/bmjsem-2022-001419 (PMC9511658; doi:10.1136/bmjsem-2022-001419), 2022-09-22
Supplement: bmjsem-2022-001419supp001.pdf [file bmjsem-2022-001419supp001.pdf]

## Supplementary Table

**Supplementary table 1.** Checklist for video evaluation.

| Variables                                | Categories                                             |
|------------------------------------------|--------------------------------------------------------|
| <b>Weather conditions</b>                |                                                        |
| <b>Precipitations</b>                    | Yes / No/Unsure                                        |
| <b>Presence of sunny weather</b>         | Yes /No / Night/Unsure                                 |
| <b>Playing phase before injury</b>       | Defensive/ Offensive/ Unsure                           |
| <b>Field position at IF</b>              |                                                        |
| <b>Long axis of field</b>                | Defensive third/Midfield third/Offensive third         |
| <b>Short axis of field</b>               | Left side corridor/Middle corridor/Right side corridor |
| <b>Player contact preciding injury</b>   | Yes/ No                                                |
| <b>If contact, where?</b>                | Upper body/ Lower body                                 |
| <b>Player contact at IF</b>              | Yes/ No/ Unsure                                        |
| <b>If indirect contact at IF, where?</b> | Upper body/ Lower body                                 |
| <b>Injury classification</b>             | Indirect contact/ non-contact                          |
| <b>How many feet on the ground</b>       | One/Two/Unsure                                         |
| <b>Leg loading at IF</b>                 | Injured Leg/Un-injured Leg                             |
| <b>Horizontal speed</b>                  | Zero/ One/ Two/ Three                                  |
| <b>Vertical speed</b>                    | Zero/ One/ Two/ Three                                  |
| <b>Distance from the ball (mts)</b>      | 0-2/ 2,5-5/ 5,5-10 / >10                               |

IF, injury frame; Speed: Zero, Zero; One, Low; Two, middle; Three, High.
