# Supplementary material for: Video analysis of Achilles tendon rupture in male professional football (soccer) players: injury mechanisms, patterns and biomechanics
Source: HighWire-hosted journal article supplement (doi:10.1136/bmjsem-2022-001419), 2022-09-01
Supplement: bmjsem-2022-001419supp002_data_supplement.pdf [file bmjsem-2022-001419supp002_data_supplement.pdf]

## Supplementary material

Distribution of ATR injuries on the football (soccer) field according to zones divisions

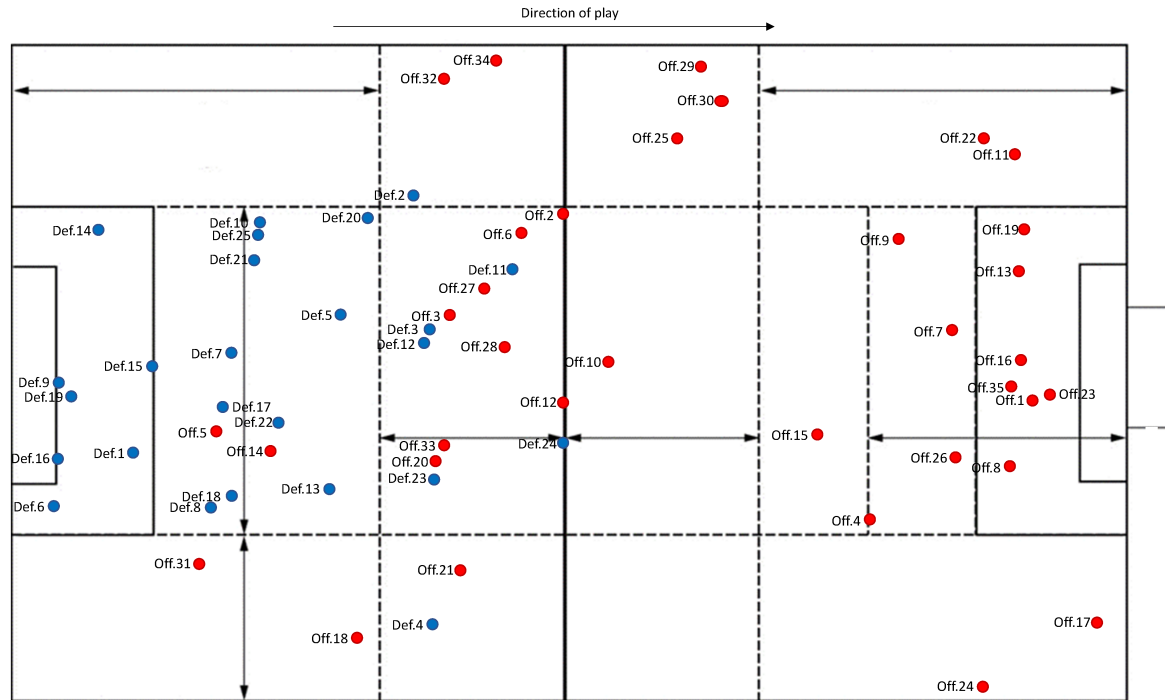

**Figure 1 (Suppl material).** Distribution of ATR injuries on the football pitch according to a modification of a previously published division of the football field. Blue dots: defensive injuries; red dots: offensive injuries. Def: defensive; Off: offensive.

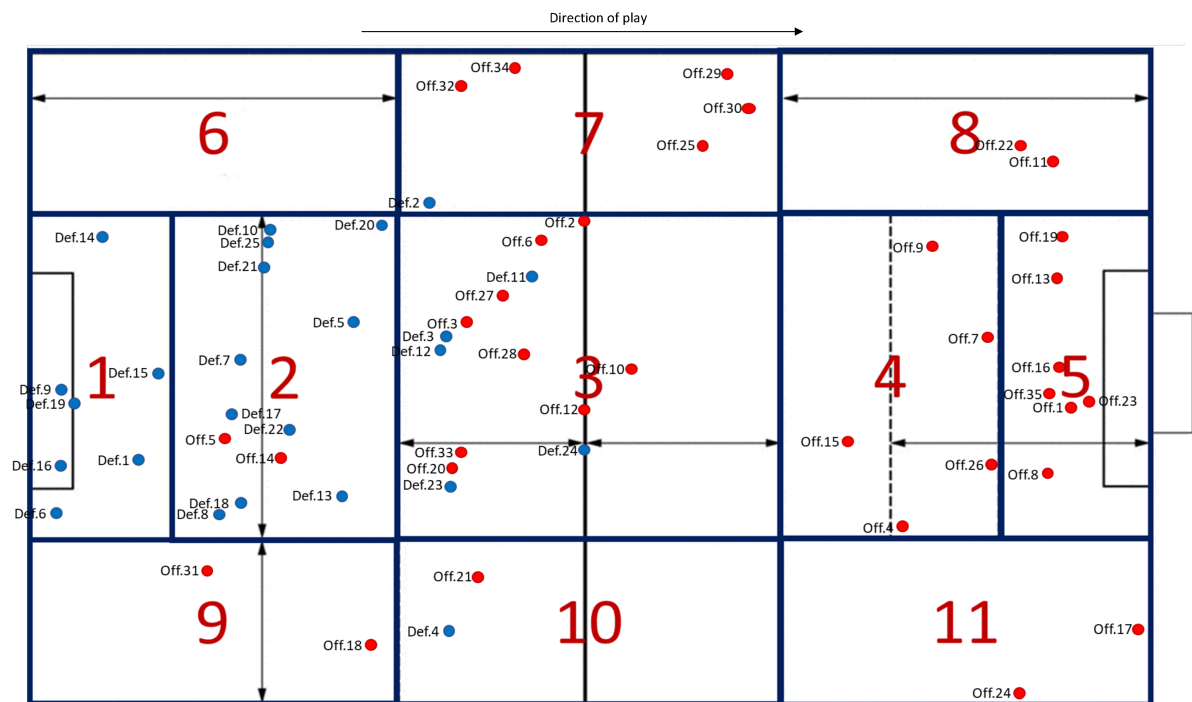

**Figure 2.** Division of field in 11 different zones according to a modified version of a published football pitch division (Andersen TE et al Br J Sport Med 2004; 38:626-631)

| Field zones               | Long axis of the field |                |                 | Short axis of the field |                 |                |
|---------------------------|------------------------|----------------|-----------------|-------------------------|-----------------|----------------|
|                           | Defensive third        | Midfield third | Offensive third | Left corridor           | Middle corridor | Right corridor |
| Square mts                | 2450                   | 2450           | 2450            | 1575                    | 4200            | 1575           |
| Number of ATR injuries    | 22                     | 22             | 16              | 8                       | 46              | 6              |
| N ATR injuries/square mts | 0,0089                 | 0,0089         | 0,0065          | 0,0050                  | 0,010           | 0,0038         |

**Table 1 (Suppl material).** Number of ATR injuries and rate of ATR injuries for square mts according to division on the long and short axis of the football field.

| Field zones                        | 1     | 2     | 3    | 4      | 5     | 6   | 7     | 8      | 9      | 10     | 11     |
|------------------------------------|-------|-------|------|--------|-------|-----|-------|--------|--------|--------|--------|
| <b>Square mts</b>                  | 660   | 740   | 1400 | 740    | 660   | 525 | 525   | 525    | 525    | 525    | 525    |
| <b>Number of ATR injures</b>       | 7     | 13    | 14   | 5      | 7     | 0   | 6     | 2      | 2      | 2      | 2      |
| <b>N ATR injuries / square mts</b> | 0,010 | 0,017 | 0,01 | 0,0067 | 0,010 | 0   | 0,011 | 0,0038 | 0,0038 | 0,0038 | 0,0038 |

**Table 2 (Suppl mat).** Division of the field in 11 different zones (see Figure 1 Suppl. Material 1) according to a modified version of a published football pitch division ((Andersen TE et al Br J Sport Med 2004; 38:626-631)

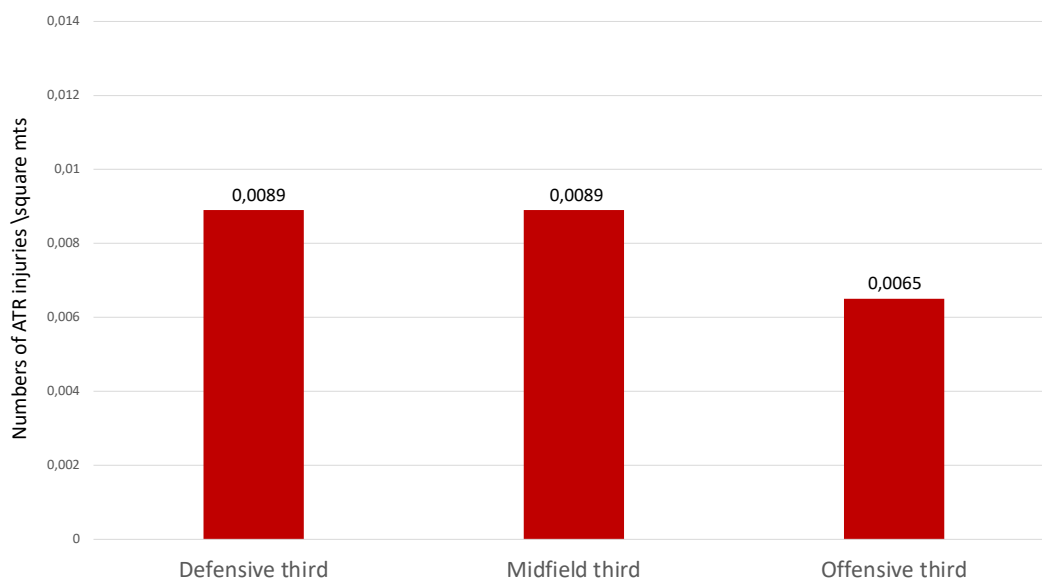

**Figure 3 (Suppl mat 2).** Rate of ATR injuries/square meters for zone divisions on the long axis of the field.

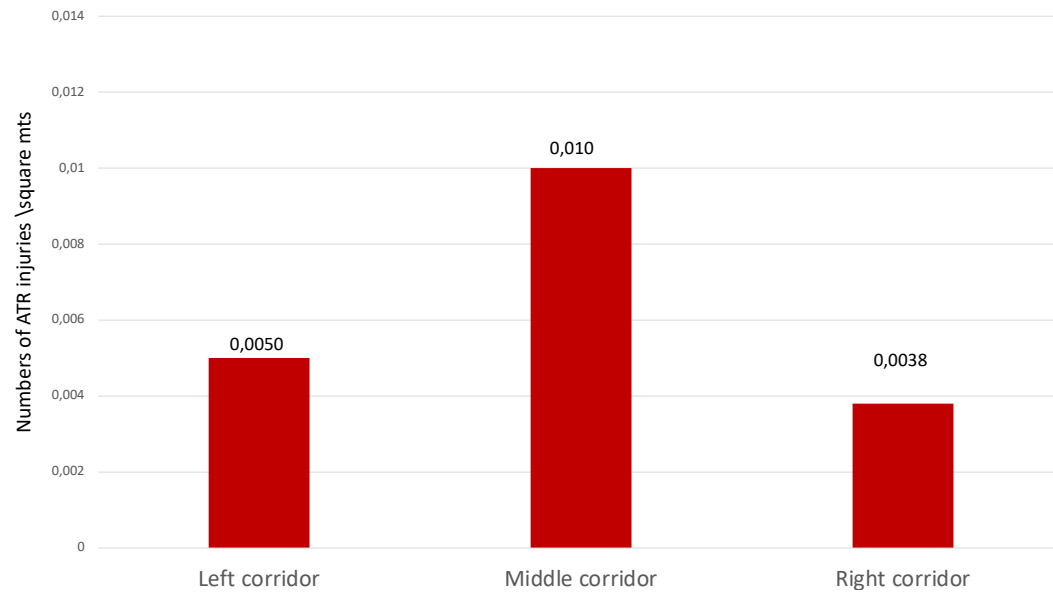

**Figure 4 (Suppl mat 2).** Rate of ATR injuries/square meters for zone divisions on the short axis of the field.

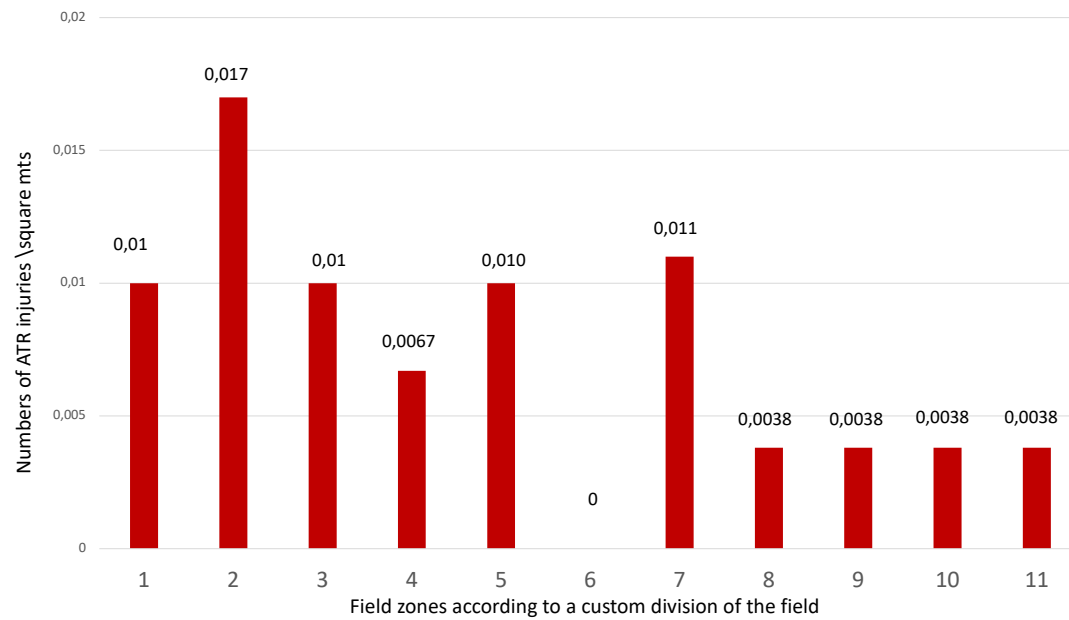

**Figure 5 (Suppl mat 1).** Rate of ATR injuries/square meters zones divisions according to Figure 1 Supplementary material.
